# Supplementary material for: Benefits of Monascus anka solid-state fermentation for quinoa polyphenol bioaccessibility and the anti-obesity effect linked with gut microbiota
Source: Royal Society of Chemistry journal article supplement (doi:10.1039/d3fo04555b), 2024-01-01
Supplement: d3fo04555b1.pdf [file d3fo04555b1.pdf]

Table S1. Ingredients of the normal diet (CON) and high fat diet (HFD)

| Ingredient         | CON  |      | HFD    |      |
|--------------------|------|------|--------|------|
|                    | gm   | kcal | gm     | kcal |
| Casein             | 140  | 560  | 200    | 800  |
| L-Cystine          | 1.8  | 7.2  | 3      | 12   |
| Corn Starch        | 496  | 1983 | 72.8   | 291  |
| Maltodextrin 10    | 125  | 500  | 100    | 400  |
| Sucrose            | 100  | 400  | 172.8  | 691  |
| Cellulose          | 50   | 0    | 50     | 0    |
| Soybean Oil        | 40   | 360  | 25     | 225  |
| Mineral Mix        | 35   | 0    | 10     | 0    |
| Vitamin Mix        | 10   | 40   | 10     | 40   |
| Choline Bitartrate | 2.5  | 0    | 2      | 0    |
| Total              | 1000 | 3850 | 858.15 | 4057 |

  

|              | gm % | kcal % | gm % | kcal % |
|--------------|------|--------|------|--------|
| Protein      | 14.2 | 14.7   | 24   | 20     |
| Carbohydrate | 73.1 | 75.9   | 41   | 35     |
| Fat          | 4    | 9.4    | 24   | 45     |
| kcal/gm      | 3.85 |        | 4.73 |        |

Table S2. Mouse specific primer sequences

| Gene     | Forward/reverse | Sequence                 |
|----------|-----------------|--------------------------|
| β-actin  | Forward primer  | GATCTGGCACCACACCTTCT     |
|          | Reverse primer  | GGGGTGTGTAAGGTCTCAAA     |
| Sod1     | Forward primer  | TGGTGGTCCATGAGAAACAA     |
|          | Reverse primer  | GTTTACTGCGCAATCCCAAT     |
| Sod2     | Forward primer  | CTGTCTTCAGCCACACCAGA     |
|          | Reverse primer  | CTGCTCTTCCAAAGGTCCTG     |
| Cat      | Forward primer  | GCACTGTTCAGCACCTTTGA     |
|          | Reverse primer  | GCAAAGGCAGCGTAGGTAAC     |
| Gpx1     | Forward primer  | CACGTGATCTCAGCACCATC     |
|          | Reverse primer  | AGAAGGCATACACGGTGGAC     |
| Ampk     | Forward primer  | GTCAAAGCCGACCCAATGATA    |
|          | Reverse primer  | CGTACACGCAAATAATAGGGGTT  |
| Srebp-1c | Forward primer  | GCCGGCGCCATGGACGAGCTGG   |
|          | Reverse primer  | CAGGAAGGCTTCCAGAGAGGAG   |
| Fas      | Forward primer  | CGGAGTCGCTTGAGTA         |
|          | Reverse primer  | ATGTTGGATTTGGTGG         |
| Ppara    | Forward primer  | CCTGGAAAGTCCCTTATCT      |
|          | Reverse primer  | GCCCTTACAGCCTTCACAT      |
| Cpt-1    | Forward primer  | GCCTTCCAGTTCACAGT        |
|          | Reverse primer  | ACCTTCAGCGAGTAGCG        |
| Acc      | Forward primer  | GGCAGCAGTTACACCACATAC    |
|          | Reverse primer  | TCATTACCTCAATCTCAGCATAGC |
| Fxr      | Forward primer  | GGCAGAATCTGGATTTGGAATCG  |
|          | Reverse primer  | GCCCAGGTTGGAATAGTAAGACG  |
| Lxr      | Forward primer  | CGAGCTATGCAGTGTATGTGGG   |
|          | Reverse primer  | ACACTCCTCCCTCATGCCT      |
| Cyp7a1   | Forward primer  | CCTTGGGACGTTTTCTGCT      |
|          | Reverse primer  | GCGCTCTTTGATTTAGGAAG     |
