# Supplementary figures and images for: Benefits of Monascus anka solid-state fermentation for quinoa polyphenol bioaccessibility and the anti-obesity effect linked with gut microbiota
Source: Royal Society of Chemistry journal article supplement (doi:10.1039/d3fo04555b), 2024-01-01

Original data of Western blots of p-AMPK, AMPK, CPT-1, SREBP-1c, PPAR $\alpha$ , CYP7A1 and FAS

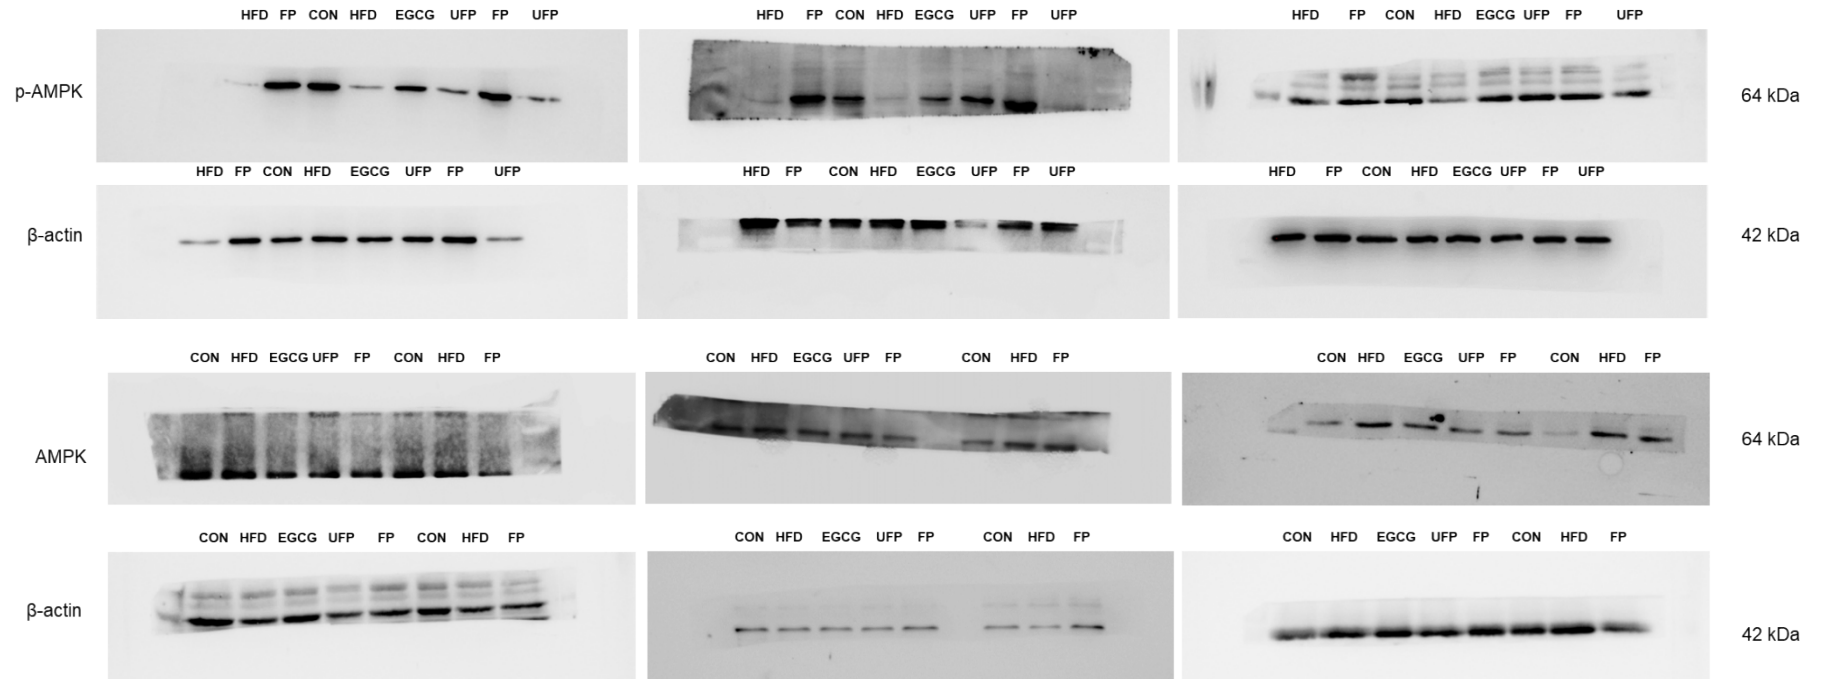

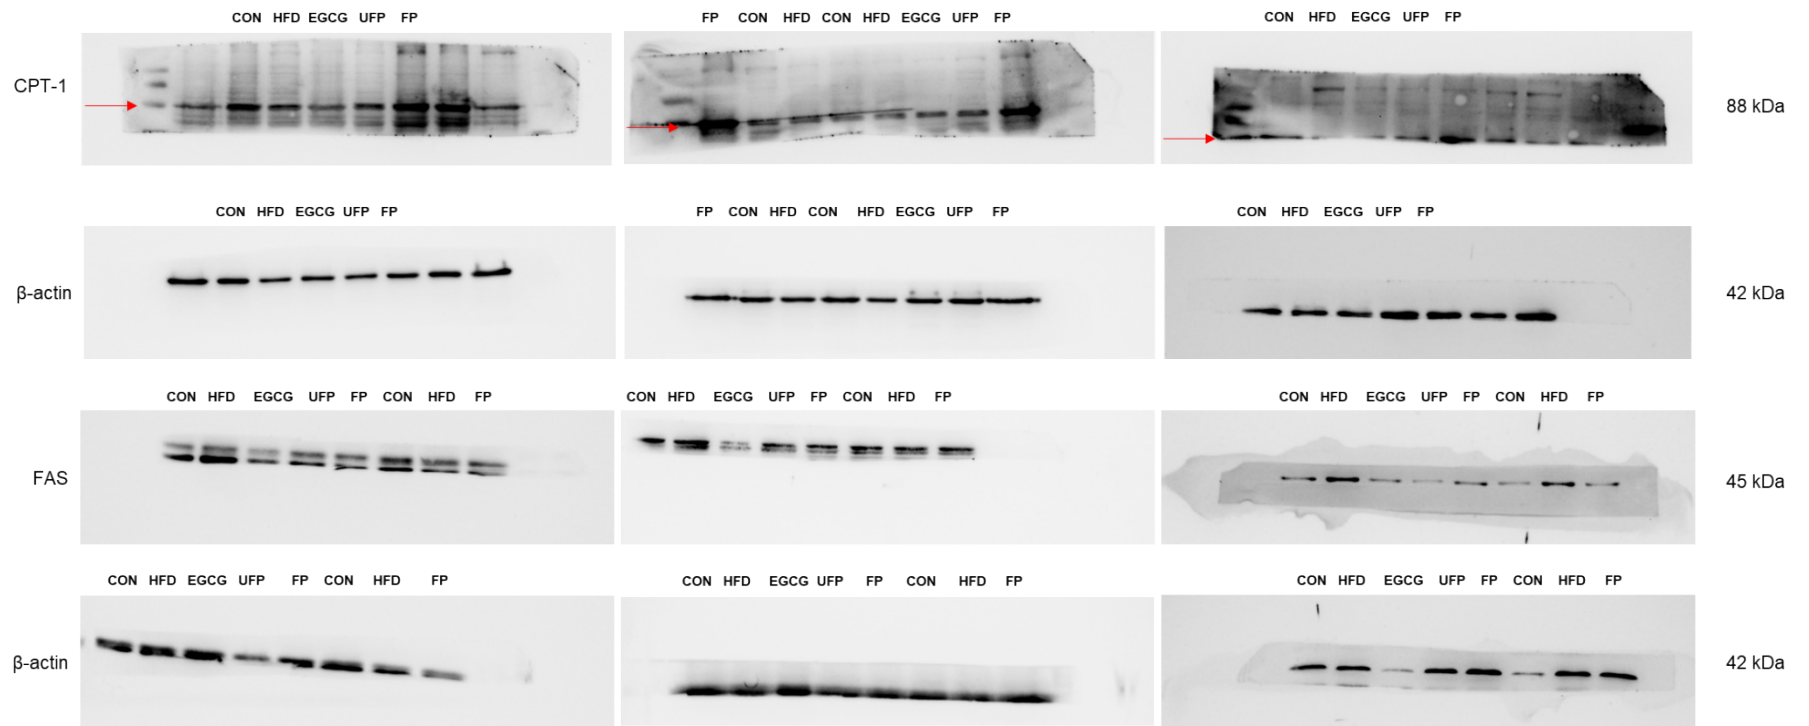

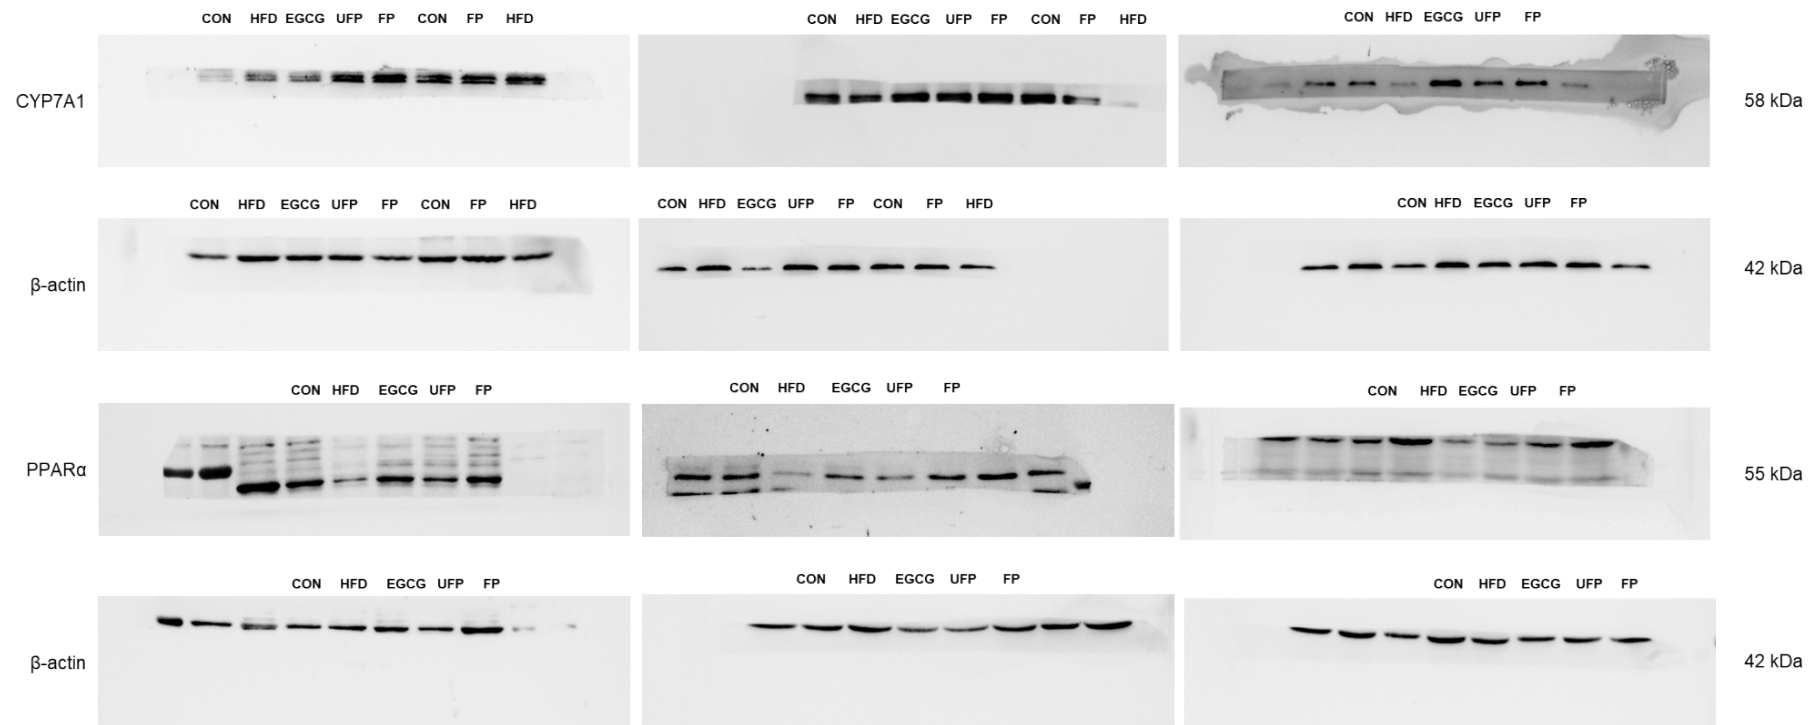

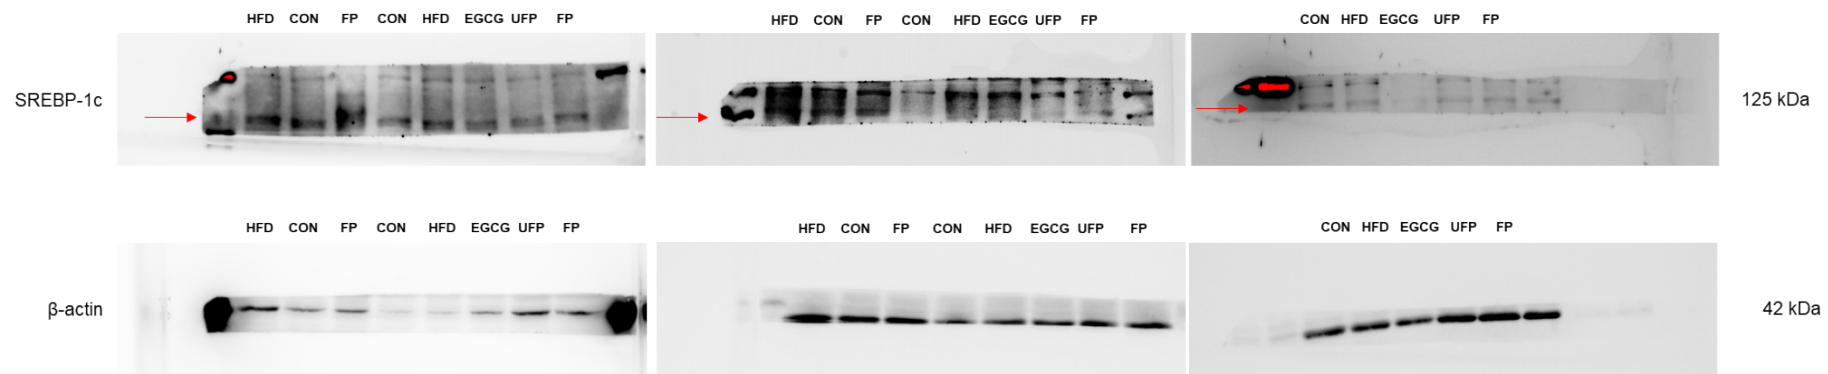

Supplement: d3fo04555b2.pdf [file d3fo04555b2.pdf]
